# Supplementary material for: Quickly Assess the Direct Loss of Houses Caused by a Typhoon-Rainstorm-Storm Surge–Flood Chain: Case of Haikou City
Source: MDPI journal article supplement (doi:10.3390/w14193037), 2022-09-27
Supplement: s1 [file s1]

Archive with 1 entries (1 files):
- water-1837704-supplementary.pdf
