# Supplementary material for: Quickly Assess the Direct Loss of Houses Caused by a Typhoon-Rainstorm-Storm Surge–Flood Chain: Case of Haikou City
Source: MDPI journal article supplement (doi:10.3390/w14193037), 2022-09-27
Supplement: s1 [file s1 › water-1837704-supplementary.pdf]

Supplementary Materials

# Quickly Assess the Direct Loss of Houses Caused by a Typhoon-Rainstorm-Storm Surge–Flood Chain: Case of Haikou City

Jinhong Wan <sup>1,2</sup>, Lisha Wang <sup>1</sup>, Yaojie Yue <sup>1,\*</sup> and Zhiyuan Wang <sup>1,3</sup>

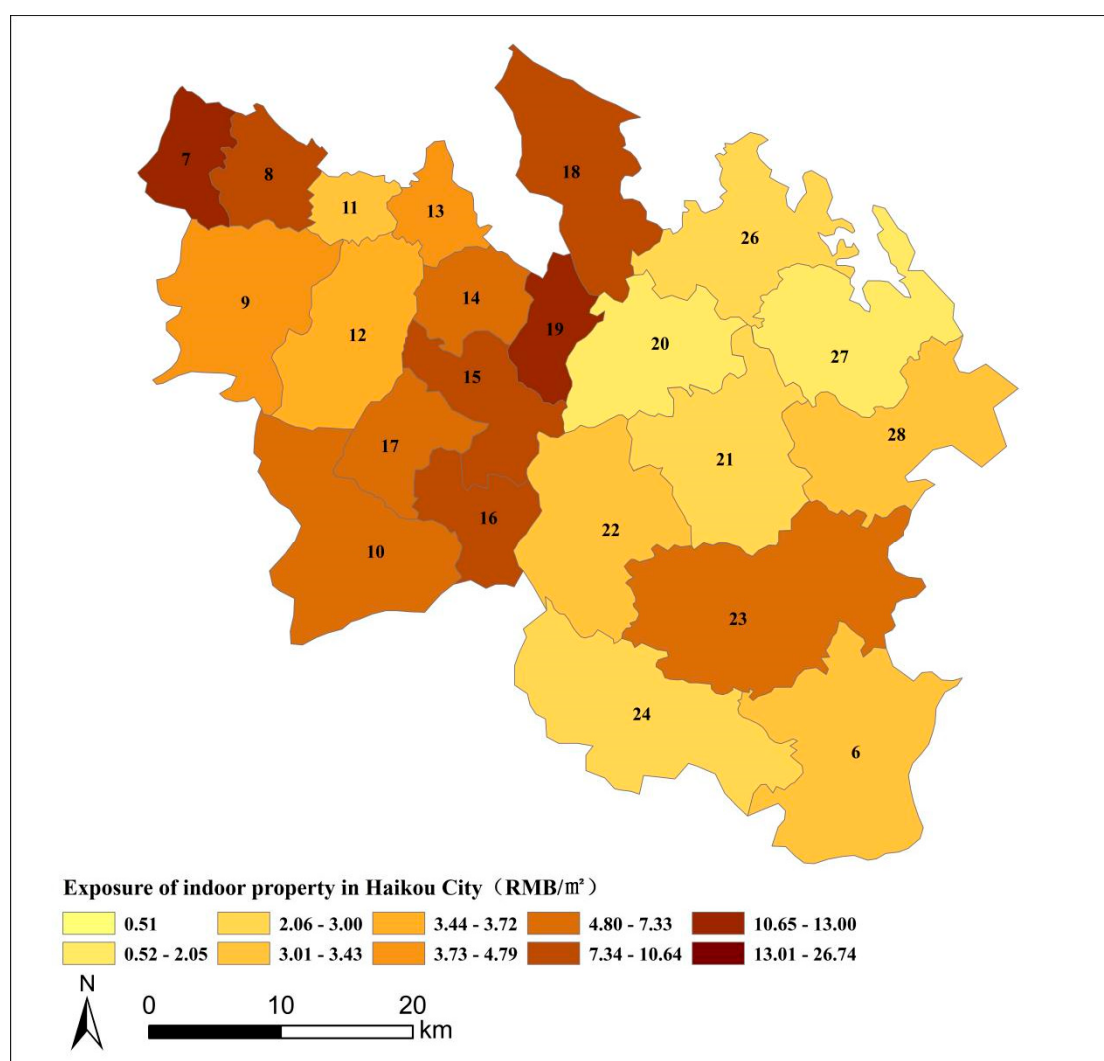

**Figure S1.** Exposure of Indoor Property of Towns in Haikou City.

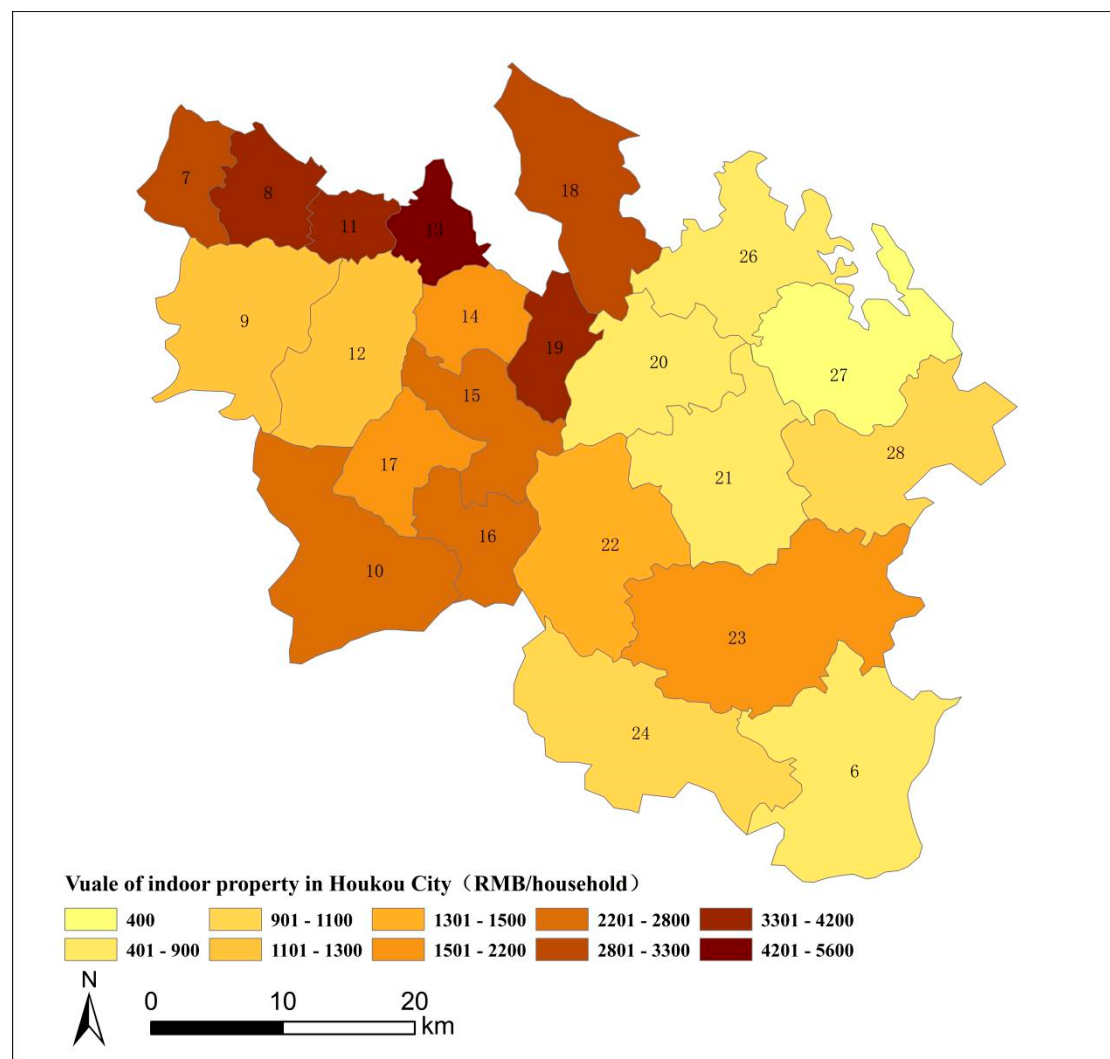

**Figure S2.** Exposure of Indoor Property of Towns in Haikou City Calculated with Field Survey Data.
